# Supplementary material for: Potential effect of household environment on prevalence of tuberculosis in India: evidence from the recent round of a cross-sectional survey
Source: Springer Nature journal article supplement (doi:10.1186/s12890-018-0627-3), 2018-05-03
Supplement: MOESM1 [file 15736964]

**CONFIDENTIAL**  
 For research purposes only

| IDENTIFICATION                                                                                                                                                                                                                                                                                                                       |                |                |                                                                                                                                                             |                                                                                                                               |  |  |  |
|--------------------------------------------------------------------------------------------------------------------------------------------------------------------------------------------------------------------------------------------------------------------------------------------------------------------------------------|----------------|----------------|-------------------------------------------------------------------------------------------------------------------------------------------------------------|-------------------------------------------------------------------------------------------------------------------------------|--|--|--|
| STATE _____                                                                                                                                                                                                                                                                                                                          |                |                |                                                                                                                                                             | <table border="1" style="width: 100%; height: 20px;"> <tr><td></td><td></td></tr> </table>                                    |  |  |  |
|                                                                                                                                                                                                                                                                                                                                      |                |                |                                                                                                                                                             |                                                                                                                               |  |  |  |
| DISTRICT _____                                                                                                                                                                                                                                                                                                                       |                |                |                                                                                                                                                             | <table border="1" style="width: 100%; height: 20px;"> <tr><td></td><td></td><td></td></tr> </table>                           |  |  |  |
|                                                                                                                                                                                                                                                                                                                                      |                |                |                                                                                                                                                             |                                                                                                                               |  |  |  |
| TEHSIL/TALUK _____                                                                                                                                                                                                                                                                                                                   |                |                |                                                                                                                                                             |                                                                                                                               |  |  |  |
| CITY/TOWN/VILLAGE _____                                                                                                                                                                                                                                                                                                              |                |                |                                                                                                                                                             |                                                                                                                               |  |  |  |
| TYPE OF PSU (URBAN = 1, RURAL = 2) .....                                                                                                                                                                                                                                                                                             |                |                |                                                                                                                                                             | <table border="1" style="width: 100%; height: 20px;"> <tr><td></td><td></td></tr> </table>                                    |  |  |  |
|                                                                                                                                                                                                                                                                                                                                      |                |                |                                                                                                                                                             |                                                                                                                               |  |  |  |
| PSU NUMBER .....                                                                                                                                                                                                                                                                                                                     |                |                |                                                                                                                                                             | <table border="1" style="width: 100%; height: 20px;"> <tr><td></td><td></td></tr> </table>                                    |  |  |  |
|                                                                                                                                                                                                                                                                                                                                      |                |                |                                                                                                                                                             |                                                                                                                               |  |  |  |
| STRUCTURE NUMBER .....                                                                                                                                                                                                                                                                                                               |                |                |                                                                                                                                                             | <table border="1" style="width: 100%; height: 20px;"> <tr><td></td><td></td><td></td></tr> </table>                           |  |  |  |
|                                                                                                                                                                                                                                                                                                                                      |                |                |                                                                                                                                                             |                                                                                                                               |  |  |  |
| HOUSEHOLD NUMBER .....                                                                                                                                                                                                                                                                                                               |                |                |                                                                                                                                                             | <table border="1" style="width: 100%; height: 20px;"> <tr><td></td><td></td></tr> </table>                                    |  |  |  |
|                                                                                                                                                                                                                                                                                                                                      |                |                |                                                                                                                                                             |                                                                                                                               |  |  |  |
| NAME OF HOUSEHOLD HEAD _____                                                                                                                                                                                                                                                                                                         |                |                |                                                                                                                                                             |                                                                                                                               |  |  |  |
| ADDRESS OF HOUSEHOLD _____                                                                                                                                                                                                                                                                                                           |                |                |                                                                                                                                                             |                                                                                                                               |  |  |  |
| IS HOUSEHOLD SELECTED FOR THE STATE MODULE? (YES = 1, NO = 2) .....                                                                                                                                                                                                                                                                  |                |                |                                                                                                                                                             | <table border="1" style="width: 100%; height: 20px;"> <tr><td></td></tr> </table>                                             |  |  |  |
|                                                                                                                                                                                                                                                                                                                                      |                |                |                                                                                                                                                             |                                                                                                                               |  |  |  |
| INTERVIEWER VISITS                                                                                                                                                                                                                                                                                                                   |                |                |                                                                                                                                                             |                                                                                                                               |  |  |  |
|                                                                                                                                                                                                                                                                                                                                      | 1              | 2              | 3                                                                                                                                                           | FINAL VISIT                                                                                                                   |  |  |  |
| DATE                                                                                                                                                                                                                                                                                                                                 | _____          | _____          | _____                                                                                                                                                       | DAY<br>MONTH<br>YEAR                                                                                                          |  |  |  |
| INTERVIEWER'S NAME                                                                                                                                                                                                                                                                                                                   | _____          | _____          | _____                                                                                                                                                       | INT. NO.                                                                                                                      |  |  |  |
| RESULT CODE*                                                                                                                                                                                                                                                                                                                         | _____          | _____          | _____                                                                                                                                                       | RESULT CODE*                                                                                                                  |  |  |  |
| NEXT VISIT: DATE<br>TIME                                                                                                                                                                                                                                                                                                             | _____<br>_____ | _____<br>_____ |                                                                                                                                                             | TOTAL NUMBER OF VISITS                                                                                                        |  |  |  |
| SUPERVISOR'S NAME                                                                                                                                                                                                                                                                                                                    | _____          |                |                                                                                                                                                             | SUPERVISOR NUMBER                                                                                                             |  |  |  |
| *RESULT CODES:<br>1 COMPLETED<br>2 NO HOUSEHOLD MEMBER AT HOME OR NO COMPETENT RESPONDENT AT HOME AT TIME OF VISIT<br>3 ENTIRE HOUSEHOLD ABSENT FOR EXTENDED PERIOD OF TIME<br>4 POSTPONED<br>5 REFUSED<br>6 DWELLING VACANT OR ADDRESS NOT A DWELLING<br>7 DWELLING DESTROYED<br>8 DWELLING NOT FOUND<br>9 OTHER _____<br>(SPECIFY) |                |                |                                                                                                                                                             | TOTAL PERSONS IN HOUSEHOLD<br>TOTAL ELIGIBLE WOMEN<br>TOTAL ELIGIBLE MEN<br>LINE NO. OF RESPONDENT TO HOUSEHOLD QUESTIONNAIRE |  |  |  |
| **LANGUAGE CODES:<br>01 ASSAMESE    08 MALAYALAM    15 TAMIL<br>02 BENGALI    09 MANIPURI    16 TELUGU<br>03 GUJARATI    10 MARATHI    17 URDU<br>04 HINDI    11 NEPALI    18 ENGLISH<br>05 KANNADA    12 ORIYA    19 GARO<br>06 KASHMIRI    13 PUNJABI    20 KHASI<br>07 KONKANI    14 SINDHI    96 OTHER<br>_____<br>SPECIFY       |                |                | **LANGUAGE OF QUESTIONNAIRE <b>HINDI</b><br>**RESPONDENT'S MOTHER TONGUE _____<br>**LANGUAGE OF INTERVIEW _____<br>TRANSLATOR USED? (YES = 1, NO = 2) ..... |                                                                                                                               |  |  |  |

INTRODUCTION AND INFORMED CONSENT

नमस्ते। मेरा नाम \_\_\_\_\_ है। मैं (NAME OF ORGANIZATION) के साथ काम कर रहा/ रही हूँ। हम पूरे भारत में स्वास्थ्य पर एक सर्वेक्षण कर रहे हैं। जो जानकारी हम परिवार कल्याण और स्वास्थ्य के बारे में घरों और व्यक्तियों से इकट्ठी करेंगे वो सरकार को स्वास्थ्य सेवाएं बनाने में मदद करेगी। आपका परिवार इस सर्वेक्षण के लिए चुना गया है। मैं आपसे आपके परिवार के बारे में कुछ सवाल पूछना चाहूँगा/ चाहूँगी। इन सवालों में लगभग 25-35 मिनट लगेंगे। आपके सारे जवाब गुप्त रखे जायेंगे और हमारे सर्वेक्षण के सदस्यों के अलावा किसी को भी नहीं बताये जायेंगे। आपका इस सर्वेक्षण में भाग लेना स्वैच्छिक है। अगर आप मेरे किसी सवाल का जवाब नहीं देना चाहते, तो मुझे बता दीजिये और मैं अगले सवाल पर चला जाऊँगा/ जाऊँगी या आप किसी भी समय यह बातचीत रोक सकते हैं।

क्या आप मुझसे कुछ सवाल पूछना चाहती / चाहते है?

ANSWER ANY QUESTIONS AND ADDRESS RESPONDENT'S CONCERNS.

यदि आपको इस सर्वेक्षण के बारे में और जानकारी चाहिए तो आप इस कार्ड पर दिए गए नाम वाले व्यक्ति को संपर्क करें।

GIVE CARD WITH CONTACT INFORMATION.

क्या आप इस सर्वेक्षण में भाग लेने के लिए सहमत हैं?

Namaste. My name is \_\_\_\_\_. I am working with (NAME OF ORGANIZATION). We are conducting a survey about health all over India. The information on family welfare and health that we collect from households and individuals will help the government to plan health services. Your household was selected for the survey. I would like to ask you some questions about your household. The questions usually take about 25-35 minutes. All of the answers you give will be confidential and will not be shared with anyone other than members of our survey team. Your participation in the survey is voluntary. If I ask you any question you don't want to answer, just let me know and I will go on to the next question or you can stop the interview at any time.

If you have any questions about this survey you may ask me.

ANSWER ANY QUESTIONS AND ADDRESS RESPONDENT'S CONCERNS.

If you have any further questions about this survey you may contact the persons listed on this card.

GIVE CARD WITH CONTACT INFORMATION.

Do you agree to participate in this survey?

SIGNATURE OF INTERVIEWER \_\_\_\_\_ DATE \_\_\_\_\_

RESPONDENT AGREES

TO BE INTERVIEWED ... 1

BEGIN INTERVIEW

RESPONDENT DOES NOT AGREE

TO BE INTERVIEWED ... 2 → END

THIS PAGE IS INTENTIONALLY BLANK

**HOUSEHOLD SCHEDULE**

अब हम उन लोगों के बारे में कुछ जानकारी चाहेंगे जो सामान्यतः आप के घर में रहते हैं या जो अभी आपके साथ रह रहे हैं।

Now we would like some information about the people who usually live in your household or who are staying with you now.

| LINE NO. | USUAL RESIDENTS AND VISITORS                                                                                                                                                                                                                                                                                                     | RELATIONSHIP TO HEAD OF HOUSEHOLD                                | SEX                       | RESIDENCE                      |                                             | AGE                              | MARITAL STATUS                                | ELIGIBILITY                                    |                        |                    | BIRTH REGISTRATION                                                                                             |
|----------|----------------------------------------------------------------------------------------------------------------------------------------------------------------------------------------------------------------------------------------------------------------------------------------------------------------------------------|------------------------------------------------------------------|---------------------------|--------------------------------|---------------------------------------------|----------------------------------|-----------------------------------------------|------------------------------------------------|------------------------|--------------------|----------------------------------------------------------------------------------------------------------------|
|          |                                                                                                                                                                                                                                                                                                                                  |                                                                  |                           | (NAME) का रिश्ता क्या है?      | क्या (NAME) सामान्यतः यहाँ (रहते/रहती) हैं? |                                  |                                               | क्या (NAME) पिछली रात यहाँ (ठहरे थे/ठहरी थीं)? | (NAME) की आयु क्या है? | IF AGE 13 OR OLDER |                                                                                                                |
|          | Please give me the names of the persons who usually live in your household and guests of the household who stayed here last night, starting with the head of the household.<br><br>AFTER LISTING THE NAME, RELATIONSHIP, SEX, RESIDENCE, AND AGE FOR EACH PERSON; ASK QUESTIONS 7A(a-c) TO BE SURE THAT THE LISTING IS COMPLETE. | What is the relationship of (NAME) to the head of the household? | Is (NAME) male or female? | Does (NAME) usually live here? | Did (NAME) stay here last night?            | How old is (NAME)?               | What is the current marital status of (NAME)? |                                                |                        |                    | Does (NAME) have a birth certificate? IF NO: Has (NAME)'s birth ever been registered with the civil authority? |
| (1)      | (2)                                                                                                                                                                                                                                                                                                                              | (A)                                                              | (4)                       | (5)                            | (6)                                         | (B)                              | (C)                                           | (9)                                            | (10)                   | (11)               | (D)                                                                                                            |
| 01       |                                                                                                                                                                                                                                                                                                                                  | <input type="text"/>                                             | M F<br>1 2                | YES NO<br>1 2                  | YES NO<br>1 2                               | IN YEARS<br><input type="text"/> | <input type="text"/>                          | 01                                             | 01                     | 01                 | C R N DK<br>1 2 3 8                                                                                            |
| 02       |                                                                                                                                                                                                                                                                                                                                  | <input type="text"/>                                             | 1 2                       | 1 2                            | 1 2                                         | <input type="text"/>             | <input type="text"/>                          | 02                                             | 02                     | 02                 | 1 2 3 8                                                                                                        |
| 03       |                                                                                                                                                                                                                                                                                                                                  | <input type="text"/>                                             | 1 2                       | 1 2                            | 1 2                                         | <input type="text"/>             | <input type="text"/>                          | 03                                             | 03                     | 03                 | 1 2 3 8                                                                                                        |
| 04       |                                                                                                                                                                                                                                                                                                                                  | <input type="text"/>                                             | 1 2                       | 1 2                            | 1 2                                         | <input type="text"/>             | <input type="text"/>                          | 04                                             | 04                     | 04                 | 1 2 3 8                                                                                                        |
| 05       |                                                                                                                                                                                                                                                                                                                                  | <input type="text"/>                                             | 1 2                       | 1 2                            | 1 2                                         | <input type="text"/>             | <input type="text"/>                          | 05                                             | 05                     | 05                 | 1 2 3 8                                                                                                        |
| 06       |                                                                                                                                                                                                                                                                                                                                  | <input type="text"/>                                             | 1 2                       | 1 2                            | 1 2                                         | <input type="text"/>             | <input type="text"/>                          | 06                                             | 06                     | 06                 | 1 2 3 8                                                                                                        |
| 07       |                                                                                                                                                                                                                                                                                                                                  | <input type="text"/>                                             | 1 2                       | 1 2                            | 1 2                                         | <input type="text"/>             | <input type="text"/>                          | 07                                             | 07                     | 07                 | 1 2 3 8                                                                                                        |
| 08       |                                                                                                                                                                                                                                                                                                                                  | <input type="text"/>                                             | 1 2                       | 1 2                            | 1 2                                         | <input type="text"/>             | <input type="text"/>                          | 08                                             | 08                     | 08                 | 1 2 3 8                                                                                                        |
| 09       |                                                                                                                                                                                                                                                                                                                                  | <input type="text"/>                                             | 1 2                       | 1 2                            | 1 2                                         | <input type="text"/>             | <input type="text"/>                          | 09                                             | 09                     | 09                 | 1 2 3 8                                                                                                        |
| 10       |                                                                                                                                                                                                                                                                                                                                  | <input type="text"/>                                             | 1 2                       | 1 2                            | 1 2                                         | <input type="text"/>             | <input type="text"/>                          | 10                                             | 10                     | 10                 | 1 2 3 8                                                                                                        |
| 11       |                                                                                                                                                                                                                                                                                                                                  | <input type="text"/>                                             | 1 2                       | 1 2                            | 1 2                                         | <input type="text"/>             | <input type="text"/>                          | 11                                             | 11                     | 11                 | 1 2 3 8                                                                                                        |

| LINE NO. | SURVIVORSHIP AND RESIDENCE OF BIOLOGICAL PARENTS |                                                                                                                                                                           |                                   |                                                                                                                                                                          | EDUCATION                            |                                                        |                                                                                     |                                                                                   |                                                                       | AADHAAR CARD                            |
|----------|--------------------------------------------------|---------------------------------------------------------------------------------------------------------------------------------------------------------------------------|-----------------------------------|--------------------------------------------------------------------------------------------------------------------------------------------------------------------------|--------------------------------------|--------------------------------------------------------|-------------------------------------------------------------------------------------|-----------------------------------------------------------------------------------|-----------------------------------------------------------------------|-----------------------------------------|
|          | IF AGE 0-17                                      |                                                                                                                                                                           |                                   |                                                                                                                                                                          | IF AGE 5 OR OLDER                    |                                                        | IF AGE 5-18                                                                         |                                                                                   |                                                                       |                                         |
|          | क्या (NAME) को जन्म देनेवाली माता जीवित है?      | क्या (NAME) को जन्म देने वाली माँ सामान्यतः इस घर में रहती हैं या वे कल रात यहाँ मेहमान थी? IF YES: उनका नाम क्या है?                                                     | क्या (NAME) के सगा पिता जीवित है? | क्या (NAME) का सगा पिता इस घर में रहते हैं या वे कल रात यहाँ मेहमान थे? IF YES: उनका नाम क्या है?                                                                        | क्या (NAME) कभी स्कूल (गया/गयी) हैं? | (NAME) ने कौन-सा उच्चतम दर्जा पास किया है?             | क्या (NAME) स्कूल वर्ष 2014-2015 के दौरान कभी स्कूल या कॉलेज गया/गयी हैं?           | (इस/उस) स्कूल वर्ष के दौरान (NAME) किस दर्जे/वर्ष में जा (रहा है/या) (रही है/थी)? | <b>IF NO ON Q.19</b><br>(NAME) के स्कूल न जाने का मुख्य कारण क्या है? | क्या (NAME) के पास आधार कार्ड है?       |
|          | Is (NAME)'s natural mother alive?                | Does (NAME)'s natural mother usually live in this household or was she a guest last night? IF YES: What is her name? IF YES: RECORD MOTHER'S LINE NO. IF NO: RECORD '00'. | Is (NAME)'s natural father alive? | Does (NAME)'s natural father usually live in this household or was he a guest last night? IF YES: What is his name? IF YES: RECORD FATHER'S LINE NO. IF NO: RECORD '00'. | Has (NAME) ever attended school?     | What is the highest standard (NAME) has completed? (E) | Did (NAME) attend school or college at any time during the 2014-15 school year? (E) | During (this/that) school year, what standard/year (is/was) (NAME) attending? (E) | What is the main reason (NAME) is not attending school? (F)           | Does (NAME) have an Aadhaar card? (21A) |
|          | (13)                                             | (14)                                                                                                                                                                      | (15)                              | (16)                                                                                                                                                                     | (17)                                 | (18)                                                   | (19)                                                                                | (20)                                                                              | (21)                                                                  | (21A)                                   |
|          | Y N DK<br>1 2 8<br>↓<br>GO TO 15                 | LINE NO.<br>□ □                                                                                                                                                           | Y N DK<br>1 2 8<br>↓<br>GO TO 17  | LINE NO.<br>□ □                                                                                                                                                          | YES NO<br>1 2<br>↓<br>GO TO 21A      | STANDARD<br>□ □                                        | YES NO<br>1 2<br>↓<br>GO TO 21                                                      | STANDARD<br>□ □                                                                   | REASON<br>□ □                                                         | YES NO<br>1 2                           |
| 01       | Y N DK<br>1 2 8<br>↓<br>GO TO 15                 | LINE NO.<br>□ □                                                                                                                                                           | Y N DK<br>1 2 8<br>↓<br>GO TO 17  | LINE NO.<br>□ □                                                                                                                                                          | YES NO<br>1 2<br>↓<br>GO TO 21A      | STANDARD<br>□ □                                        | YES NO<br>1 2<br>↓<br>GO TO 21                                                      | STANDARD<br>□ □                                                                   | REASON<br>□ □                                                         | YES NO<br>1 2                           |
| 02       | Y N DK<br>1 2 8<br>↓<br>GO TO 15                 | LINE NO.<br>□ □                                                                                                                                                           | Y N DK<br>1 2 8<br>↓<br>GO TO 17  | LINE NO.<br>□ □                                                                                                                                                          | YES NO<br>1 2<br>↓<br>GO TO 21A      | STANDARD<br>□ □                                        | YES NO<br>1 2<br>↓<br>GO TO 21                                                      | STANDARD<br>□ □                                                                   | REASON<br>□ □                                                         | YES NO<br>1 2                           |
| 03       | Y N DK<br>1 2 8<br>↓<br>GO TO 15                 | LINE NO.<br>□ □                                                                                                                                                           | Y N DK<br>1 2 8<br>↓<br>GO TO 17  | LINE NO.<br>□ □                                                                                                                                                          | YES NO<br>1 2<br>↓<br>GO TO 21A      | STANDARD<br>□ □                                        | YES NO<br>1 2<br>↓<br>GO TO 21                                                      | STANDARD<br>□ □                                                                   | REASON<br>□ □                                                         | YES NO<br>1 2                           |
| 04       | Y N DK<br>1 2 8<br>↓<br>GO TO 15                 | LINE NO.<br>□ □                                                                                                                                                           | Y N DK<br>1 2 8<br>↓<br>GO TO 17  | LINE NO.<br>□ □                                                                                                                                                          | YES NO<br>1 2<br>↓<br>GO TO 21A      | STANDARD<br>□ □                                        | YES NO<br>1 2<br>↓<br>GO TO 21                                                      | STANDARD<br>□ □                                                                   | REASON<br>□ □                                                         | YES NO<br>1 2                           |
| 05       | Y N DK<br>1 2 8<br>↓<br>GO TO 15                 | LINE NO.<br>□ □                                                                                                                                                           | Y N DK<br>1 2 8<br>↓<br>GO TO 17  | LINE NO.<br>□ □                                                                                                                                                          | YES NO<br>1 2<br>↓<br>GO TO 21A      | STANDARD<br>□ □                                        | YES NO<br>1 2<br>↓<br>GO TO 21                                                      | STANDARD<br>□ □                                                                   | REASON<br>□ □                                                         | YES NO<br>1 2                           |
| 06       | Y N DK<br>1 2 8<br>↓<br>GO TO 15                 | LINE NO.<br>□ □                                                                                                                                                           | Y N DK<br>1 2 8<br>↓<br>GO TO 17  | LINE NO.<br>□ □                                                                                                                                                          | YES NO<br>1 2<br>↓<br>GO TO 21A      | STANDARD<br>□ □                                        | YES NO<br>1 2<br>↓<br>GO TO 21                                                      | STANDARD<br>□ □                                                                   | REASON<br>□ □                                                         | YES NO<br>1 2                           |
| 07       | Y N DK<br>1 2 8<br>↓<br>GO TO 15                 | LINE NO.<br>□ □                                                                                                                                                           | Y N DK<br>1 2 8<br>↓<br>GO TO 17  | LINE NO.<br>□ □                                                                                                                                                          | YES NO<br>1 2<br>↓<br>GO TO 21A      | STANDARD<br>□ □                                        | YES NO<br>1 2<br>↓<br>GO TO 21                                                      | STANDARD<br>□ □                                                                   | REASON<br>□ □                                                         | YES NO<br>1 2                           |
| 08       | Y N DK<br>1 2 8<br>↓<br>GO TO 15                 | LINE NO.<br>□ □                                                                                                                                                           | Y N DK<br>1 2 8<br>↓<br>GO TO 17  | LINE NO.<br>□ □                                                                                                                                                          | YES NO<br>1 2<br>↓<br>GO TO 21A      | STANDARD<br>□ □                                        | YES NO<br>1 2<br>↓<br>GO TO 21                                                      | STANDARD<br>□ □                                                                   | REASON<br>□ □                                                         | YES NO<br>1 2                           |
| 09       | Y N DK<br>1 2 8<br>↓<br>GO TO 15                 | LINE NO.<br>□ □                                                                                                                                                           | Y N DK<br>1 2 8<br>↓<br>GO TO 17  | LINE NO.<br>□ □                                                                                                                                                          | YES NO<br>1 2<br>↓<br>GO TO 21A      | STANDARD<br>□ □                                        | YES NO<br>1 2<br>↓<br>GO TO 21                                                      | STANDARD<br>□ □                                                                   | REASON<br>□ □                                                         | YES NO<br>1 2                           |
| 10       | Y N DK<br>1 2 8<br>↓<br>GO TO 15                 | LINE NO.<br>□ □                                                                                                                                                           | Y N DK<br>1 2 8<br>↓<br>GO TO 17  | LINE NO.<br>□ □                                                                                                                                                          | YES NO<br>1 2<br>↓<br>GO TO 21A      | STANDARD<br>□ □                                        | YES NO<br>1 2<br>↓<br>GO TO 21                                                      | STANDARD<br>□ □                                                                   | REASON<br>□ □                                                         | YES NO<br>1 2                           |
| 11       | Y N DK<br>1 2 8<br>↓<br>GO TO 15                 | LINE NO.<br>□ □                                                                                                                                                           | Y N DK<br>1 2 8<br>↓<br>GO TO 17  | LINE NO.<br>□ □                                                                                                                                                          | YES NO<br>1 2<br>↓<br>GO TO 21A      | STANDARD<br>□ □                                        | YES NO<br>1 2<br>↓<br>GO TO 21                                                      | STANDARD<br>□ □                                                                   | REASON<br>□ □                                                         | YES NO<br>1 2                           |

TICK HERE IF CONTINUATION QUESTIONNAIRE USED

7A यह सुनिश्चित करने के लिये की मैंने आपके पूरे परिवार का सूचीकरण कर लिया है:  
Just to make sure that I have a complete household listing:

- a) क्या यहां कोई अन्य व्यक्ति हैं जिन को हमने इस सूची में शामिल नहीं किया है जैसे कि छोटे बच्चे या शिशु?  
Are there any other persons such as small children or infants that we have not listed?  
YES → ENTER EACH IN TABLE NO
- b) क्या यहां ऐसे कोई अन्य लोग सामान्यतः रहते हैं जो आपके परिवार के सदस्य नहीं हैं जैसे घरेलू नौकर या दोस्त?  
Are there any other people who may not be members of your family such as domestic servants, lodgers or friends who usually live here?  
YES → ENTER EACH IN TABLE NO
- c) क्या पिछली रात यहां कोई मेहमान, अस्थायी आगन्तुक अथवा कोई अन्य व्यक्ति ठहरे थे जो इस सूची में शामिल नहीं हैं?  
Are there any guests or temporary visitors staying here, or anyone else who stayed here last night, who have not been listed?  
YES → ENTER EACH IN TABLE NO

**(A) CODES FOR Q. 3**

**RELATIONSHIP TO HEAD OF HOUSEHOLD:**

- 01 = HEAD  
02 = WIFE OR HUSBAND  
03 = SON OR DAUGHTER  
04 = SON-IN-LAW OR DAUGHTER-IN-LAW  
05 = GRANDCHILD  
06 = PARENT  
07 = PARENT-IN-LAW  
08 = BROTHER OR SISTER  
09 = BROTHER-IN-LAW OR SISTER-IN-LAW  
10 = NIECE/NEPHEW  
11 = OTHER RELATIVE  
12 = ADOPTED/FOSTER/STEP-CHILD  
13 = DOMESTIC SERVANT  
14 = OTHER NOT RELATED  
98 = DON'T KNOW

**(B) CODES FOR Q. 7**

**AGE:**

- 00 = AGE LESS THAN ONE YEAR  
95 = AGE 95 YEARS OR MORE

**(C) CODES FOR Q. 8**

**MARITAL STATUS:**

- 1 = CURRENTLY MARRIED  
2 = MARRIED, BUT GAUNA NOT PERFORMED  
3 = WIDOWED  
4 = DIVORCED  
5 = SEPARATED  
6 = DESERTED  
7 = NEVER MARRIED  
8 = DON'T KNOW

**(D) CODES FOR Q. 12**

**BIRTH REGISTRATION:**

- 1 = C = CERTIFICATE  
2 = R = REGISTRATION  
3 = N = NEITHER  
8 = DK = DON'T KNOW

**(E) CODES FOR Q.18 AND Q.20**

**EDUCATION STANDARD:**

- 00 = LESS THAN 1 YEAR COMPLETED OR PRE-PRIMARY  
98 = DON'T KNOW

**(F) CODES FOR 21**

**REASON FOR NOT ATTENDING SCHOOL:**

- 01 = SCHOOL TOO FAR AWAY  
02 = TRANSPORT NOT AVAILABLE  
03 = FURTHER EDUCATION NOT CONSIDERED NECESSARY  
04 = REQUIRED FOR HOUSEHOLD WORK  
05 = REQUIRED FOR WORK ON FARM/FAMILY BUSINESS  
06 = REQUIRED FOR OUTSIDE WORK FOR PAYMENT IN CASH OR KIND  
07 = COSTS TOO MUCH  
08 = NO PROPER SCHOOL FACILITIES FOR GIRLS  
09 = NOT SAFE TO SEND GIRLS  
10 = NO FEMALE TEACHER  
11 = REQUIRED FOR CARE OF SIBLINGS  
12 = NOT INTERESTED IN STUDIES  
13 = REPEATED FAILURES  
14 = GOT MARRIED  
15 = DID NOT GET ADMISSION  
96 = OTHER  
98 = DON'T KNOW

| NO.      | QUESTIONS AND FILTERS                                                                                                                                                                                                                                              | CODING CATEGORIES                                                                                                                                                                                                                                                                                                                                                                                                                                                                                                                                                                                                                                                                                                             | SKIP                    |                        |                         |              |    |          |  |  |  |  |          |  |  |  |  |          |  |  |  |  |          |  |  |  |  |  |
|----------|--------------------------------------------------------------------------------------------------------------------------------------------------------------------------------------------------------------------------------------------------------------------|-------------------------------------------------------------------------------------------------------------------------------------------------------------------------------------------------------------------------------------------------------------------------------------------------------------------------------------------------------------------------------------------------------------------------------------------------------------------------------------------------------------------------------------------------------------------------------------------------------------------------------------------------------------------------------------------------------------------------------|-------------------------|------------------------|-------------------------|--------------|----|----------|--|--|--|--|----------|--|--|--|--|----------|--|--|--|--|----------|--|--|--|--|--|
| 22       | <p>कोई व्यक्ति प्रायः कितनी बार आपके घर के अंदर धूम्रपान करता है, क्या आप कहेंगे रोजाना, हप्ते में एकबार, महिने में एक बार, कभी नहीं?</p> <p>How often does anyone smoke inside your house? Would you say daily, weekly, monthly, less than monthly, or never?</p> | <p>DAILY ..... 1</p> <p>WEEKLY ..... 2</p> <p>MONTHLY ..... 3</p> <p>LESS THAN MONTHLY ..... 4</p> <p>NEVER ..... 5</p>                                                                                                                                                                                                                                                                                                                                                                                                                                                                                                                                                                                                       |                         |                        |                         |              |    |          |  |  |  |  |          |  |  |  |  |          |  |  |  |  |          |  |  |  |  |  |
| 23       | <p>क्या आपके घर का कोई सामान्य निवासी तपेदिक [टी बी] रोग से पीड़ित है?</p> <p>Does any usual resident of your household suffer from tuberculosis?</p>                                                                                                              | <p>YES ..... 1</p> <p>NO ..... 2</p>                                                                                                                                                                                                                                                                                                                                                                                                                                                                                                                                                                                                                                                                                          | → 25                    |                        |                         |              |    |          |  |  |  |  |          |  |  |  |  |          |  |  |  |  |          |  |  |  |  |  |
| 24       | <p>तपेदिक [टी बी] रोग से कौन पीड़ित है? कोई अन्य?</p> <p>Who suffers from tuberculosis? Anyone else?</p> <p>RECORD LINE NUMBER(S).<br/>IF NO MORE TB CASES, RECORD '95'.</p>                                                                                       | <p>24A FOR EACH PERSON, ASK:<br/>क्या (NAME) ने तपेदिक [टी बी] के लिए चिकित्सकीय इलाज कराया है?<br/>IF YES, ASK: (NAME) कहाँ गये?</p> <p>Has (NAME) received medical treatment for the tuberculosis?<br/>IF YES, ASK: Where did (NAME) go?</p> <table border="1"> <thead> <tr> <th></th> <th>YES,<br/>PUBLIC<br/>ONLY</th> <th>YES,<br/>PRIVATE<br/>ONLY</th> <th>YES,<br/>BOTH</th> <th>NO</th> </tr> </thead> <tbody> <tr> <td>LINE NO.</td> <td></td> <td></td> <td></td> <td></td> </tr> </tbody> </table> |                         | YES,<br>PUBLIC<br>ONLY | YES,<br>PRIVATE<br>ONLY | YES,<br>BOTH | NO | LINE NO. |  |  |  |  | LINE NO. |  |  |  |  | LINE NO. |  |  |  |  | LINE NO. |  |  |  |  |  |
|          | YES,<br>PUBLIC<br>ONLY                                                                                                                                                                                                                                             | YES,<br>PRIVATE<br>ONLY                                                                                                                                                                                                                                                                                                                                                                                                                                                                                                                                                                                                                                                                                                       | YES,<br>BOTH            | NO                     |                         |              |    |          |  |  |  |  |          |  |  |  |  |          |  |  |  |  |          |  |  |  |  |  |
| LINE NO. |                                                                                                                                                                                                                                                                    |                                                                                                                                                                                                                                                                                                                                                                                                                                                                                                                                                                                                                                                                                                                               |                         |                        |                         |              |    |          |  |  |  |  |          |  |  |  |  |          |  |  |  |  |          |  |  |  |  |  |
| LINE NO. |                                                                                                                                                                                                                                                                    |                                                                                                                                                                                                                                                                                                                                                                                                                                                                                                                                                                                                                                                                                                                               |                         |                        |                         |              |    |          |  |  |  |  |          |  |  |  |  |          |  |  |  |  |          |  |  |  |  |  |
| LINE NO. |                                                                                                                                                                                                                                                                    |                                                                                                                                                                                                                                                                                                                                                                                                                                                                                                                                                                                                                                                                                                                               |                         |                        |                         |              |    |          |  |  |  |  |          |  |  |  |  |          |  |  |  |  |          |  |  |  |  |  |
| LINE NO. |                                                                                                                                                                                                                                                                    |                                                                                                                                                                                                                                                                                                                                                                                                                                                                                                                                                                                                                                                                                                                               |                         |                        |                         |              |    |          |  |  |  |  |          |  |  |  |  |          |  |  |  |  |          |  |  |  |  |  |
| 25       | <p>आपके घर के सदस्यों के लिए पीने के पानी का मुख्य स्रोत क्या है?</p> <p>What is the main source of drinking water for members of your household?</p>                                                                                                              | <p><b>PIPED WATER</b></p> <p>PIPED INTO DWELLING ..... 11</p> <p>PIPED TO YARD/PLOT ..... 12</p> <p>PUBLIC TAP/STANDPIPE ..... 13</p> <p>TUBE WELL OR BOREHOLE ..... 21</p> <p><b>DUG WELL</b></p> <p>PROTECTED WELL ..... 31</p> <p>UNPROTECTED WELL ..... 32</p> <p><b>WATER FROM SPRING</b></p> <p>PROTECTED SPRING ..... 41</p> <p>UNPROTECTED SPRING ..... 42</p> <p>RAINWATER ..... 51</p> <p>TANKER TRUCK ..... 61</p> <p>CART WITH SMALL TANK ..... 71</p> <p>SURFACE WATER (RIVER/DAM/<br/>LAKE/POND/STREAM/CANAL/<br/>IRRIGATION CHANNEL) ..... 81</p> <p>BOTTLED WATER ..... 91</p> <p>COMMUNITY RO PLANT ..... 92</p> <p>OTHER ..... 96</p> <p>(SPECIFY)</p>                                                      | <p>→ 29</p> <p>→ 29</p> |                        |                         |              |    |          |  |  |  |  |          |  |  |  |  |          |  |  |  |  |          |  |  |  |  |  |
| 26       | <p>पानी का स्रोत कहाँ पर है?</p> <p>Where is the water source located?</p>                                                                                                                                                                                         | <p>IN OWN DWELLING ..... 1</p> <p>IN OWN YARD/PLOT ..... 2</p> <p>ELSEWHERE ..... 3</p>                                                                                                                                                                                                                                                                                                                                                                                                                                                                                                                                                                                                                                       | → 29                    |                        |                         |              |    |          |  |  |  |  |          |  |  |  |  |          |  |  |  |  |          |  |  |  |  |  |

| NO. | QUESTIONS AND FILTERS                                                                                                                                                                                               | CODING CATEGORIES                                                                                                                                                                                                                                                                                                                                                                                                                                                                                                                                                                                      | SKIP        |
|-----|---------------------------------------------------------------------------------------------------------------------------------------------------------------------------------------------------------------------|--------------------------------------------------------------------------------------------------------------------------------------------------------------------------------------------------------------------------------------------------------------------------------------------------------------------------------------------------------------------------------------------------------------------------------------------------------------------------------------------------------------------------------------------------------------------------------------------------------|-------------|
| 27  | <p>वहाँ एक बार जाने में, पानी लेने में, और वापस आने में कितना समय लगता है?</p> <p>How long does it take to go there, get water, and come back in one trip?</p>                                                      | <p>MINUTES ..... <input type="text"/> <input type="text"/> <input type="text"/></p> <p>DELIVERED TO DWELLING ..... 000</p> <p>ON THE PREMISES ..... 996</p> <p>DON'T KNOW ..... 998</p>                                                                                                                                                                                                                                                                                                                                                                                                                | <p>→ 29</p> |
| 28  | <p>आपके घर के लिए इस स्रोत से पानी लाने के लिए सामान्यतः कौन जाता है?</p> <p>Who usually goes to this source to fetch the water for your household?</p>                                                             | <p>ADULT WOMAN ..... 1</p> <p>ADULT MAN ..... 2</p> <p>FEMALE CHILD</p> <p>UNDER AGE 15 YEARS ..... 3</p> <p>MALE CHILD</p> <p>UNDER AGE 15 YEARS ..... 4</p> <p>OTHER ..... 6</p> <p>(SPECIFY)</p>                                                                                                                                                                                                                                                                                                                                                                                                    |             |
| 29  | <p>क्या आपके घर के सदस्य पीने के पानी को सुरक्षित बनाने के लिए कुछ करते हैं?</p> <p>Does this household do anything to the water to make it safer to drink?</p>                                                     | <p>YES ..... 1</p> <p>NO ..... 2</p> <p>DON'T KNOW ..... 8</p>                                                                                                                                                                                                                                                                                                                                                                                                                                                                                                                                         | <p>→ 31</p> |
| 30  | <p>पीने के पानी को सुरक्षित बनाने के लिए सामान्यतः आपका परिवार क्या करता है? कोई अन्य?</p> <p>What does this household usually do to make the water safer to drink? Anything else?</p> <p>RECORD ALL MENTIONED.</p> | <p>BOIL ..... A</p> <p>USE ALUM ..... B</p> <p>ADD BLEACH/CHLORINE TABLETS ..... C</p> <p>STRAIN THROUGH A CLOTH ..... D</p> <p>USE WATER FILTER (CERAMIC/SAND/COMPOSITE/ETC.) ..... E</p> <p>USE ELECTRONIC PURIFIER ..... F</p> <p>LET IT STAND AND SETTLE ..... G</p> <p>OTHER ..... X</p> <p>(SPECIFY)</p> <p>DON'T KNOW ..... Z</p>                                                                                                                                                                                                                                                               |             |
| 31  | <p>आपके परिवार के सदस्य सामान्यतः किस प्रकार की शौच सुविधा का इस्तेमाल करते हैं?</p> <p>What kind of toilet facility do members of your household usually use?</p>                                                  | <p><b>FLUSH OR POUR FLUSH TOILET</b></p> <p>FLUSH TO PIPED SEWER SYSTEM ..... 11</p> <p>FLUSH TO SEPTIC TANK ..... 12</p> <p>FLUSH TO PIT LATRINE ..... 13</p> <p>FLUSH TO SOMEWHERE ELSE ..... 14</p> <p>FLUSH, DON'T KNOW WHERE ..... 15</p> <p><b>PIT LATRINE</b></p> <p>VENTILATED IMPROVED</p> <p>PIT (VIP)/BIOGAS LATRINE ..... 21</p> <p>PIT LATRINE WITH SLAB ..... 22</p> <p>PIT LATRINE WITHOUT SLAB/OPEN PIT ..... 23</p> <p>TWIN PIT/COMPOSTING TOILET ..... 31</p> <p>DRY TOILET ..... 41</p> <p>NO FACILITY/USES OPEN SPACE OR FIELD ..... 51</p> <p>OTHER ..... 96</p> <p>(SPECIFY)</p> | <p>→ 34</p> |
| 32  | <p>क्या इस शौच सुविधा का इस्तेमाल अन्य परिवार भी करते हैं?</p> <p>Do you share this toilet facility with other households?</p>                                                                                      | <p>YES ..... 1</p> <p>NO ..... 2</p>                                                                                                                                                                                                                                                                                                                                                                                                                                                                                                                                                                   | <p>→ 34</p> |

| NO. | QUESTIONS AND FILTERS                                                                                                                                                               | CODING CATEGORIES                                                                                                                                                                                                                   | SKIP   |
|-----|-------------------------------------------------------------------------------------------------------------------------------------------------------------------------------------|-------------------------------------------------------------------------------------------------------------------------------------------------------------------------------------------------------------------------------------|--------|
| 33  | कितने परिवार इस शौच सुविधा का इस्तेमाल करते हैं?<br>How many households use this toilet facility?                                                                                   | NO. OF HOUSEHOLDS<br>IF LESS THAN 10 ..... 0<br>10 OR MORE HOUSEHOLDS ..... 95<br>DON'T KNOW ..... 98                                                                                                                               |        |
| 34  | परिवार के मुखिया का धर्म क्या है?<br>What is the religion of the head of the household?                                                                                             | HINDU ..... 01<br>MUSLIM ..... 02<br>CHRISTIAN ..... 03<br>SIKH ..... 04<br>BUDDHIST/NEO-BUDDHIST ..... 05<br>JAIN ..... 06<br>JEWISH ..... 07<br>PARSI/ZOROASTRIAN ..... 08<br>NO RELIGION ..... 09<br>OTHER ..... 96<br>(SPECIFY) |        |
| 35  | परिवार के मुखिया की जाति या जनजाति क्या है?<br>What is the caste or tribe of the head of the household?                                                                             | CASTE ..... 991<br>(SPECIFY)<br>TRIBE ..... 992<br>(SPECIFY)<br>NO CASTE/TRIBE ..... 993<br>DON'T KNOW ..... 998                                                                                                                    | → 37   |
| 36  | क्या यह अनुसूचित जाति, अनुसूचित जनजाति, अन्य पिछड़े वर्ग में से है या इनमें से कोई नहीं है?<br>Is this a scheduled caste, a scheduled tribe, other backward class, or none of them? | SCHEDULED CASTE ..... 1<br>SCHEDULED TRIBE ..... 2<br>OTHER BACKWARD CLASS ..... 3<br>NONE OF THEM ..... 4<br>DON'T KNOW ..... 8                                                                                                    |        |
| 37  | क्या आपके घर में _____ हैं:<br>Does your household have:                                                                                                                            |                                                                                                                                                                                                                                     |        |
|     |                                                                                                                                                                                     |                                                                                                                                                                                                                                     | YES NO |
|     | a) Electricity? बिजली?                                                                                                                                                              | ELECTRICITY ..... 1                                                                                                                                                                                                                 | 2      |
|     | b) A mattress? गद्दा?                                                                                                                                                               | MATTRESS ..... 1                                                                                                                                                                                                                    | 2      |
|     | c) A pressure cooker? प्रेशर कुकर?                                                                                                                                                  | PRESSURE COOKER ..... 1                                                                                                                                                                                                             | 2      |
|     | d) A chair? कुर्सी?                                                                                                                                                                 | CHAIR ..... 1                                                                                                                                                                                                                       | 2      |
|     | e) A cot or bed? खाट या चारपाई?                                                                                                                                                     | COT/BED ..... 1                                                                                                                                                                                                                     | 2      |
|     | f) A table? मेज?                                                                                                                                                                    | TABLE ..... 1                                                                                                                                                                                                                       | 2      |
|     | g) An electric fan? बिजली का पंखा?                                                                                                                                                  | ELECTRIC FAN ..... 1                                                                                                                                                                                                                | 2      |
|     | h) A radio or transistor? रेडियो या ट्रांजिस्टर?                                                                                                                                    | RADIO/TRANSISTOR ..... 1                                                                                                                                                                                                            | 2      |
|     | i) A black and white television? काला और सफेद टेलीविजन?                                                                                                                             | B & W TELEVISION ..... 1                                                                                                                                                                                                            | 2      |
|     | j) A colour television? रंगीन टेलीविजन?                                                                                                                                             | COLOUR TELEVISION ..... 1                                                                                                                                                                                                           | 2      |
|     | k) A sewing machine? सिलाई मशीन?                                                                                                                                                    | SEWING MACHINE ..... 1                                                                                                                                                                                                              | 2      |
|     | l) A mobile telephone? मोबाईल टेलीफोन?                                                                                                                                              | MOBILE TELEPHONE ..... 1                                                                                                                                                                                                            | 2      |
|     | m) A land line telephone? लैंडलाइन टेलीफोन?                                                                                                                                         | LAND LINE TELEPHONE ..... 1                                                                                                                                                                                                         | 2      |
|     | n) Internet? इंटरनेट?                                                                                                                                                               | INTERNET ..... 1                                                                                                                                                                                                                    | 2      |
|     | o) A computer? कम्प्यूटर?                                                                                                                                                           | COMPUTER ..... 1                                                                                                                                                                                                                    | 2      |
|     | p) A refrigerator? रेफ्रिजरेटर?                                                                                                                                                     | REFRIGERATOR ..... 1                                                                                                                                                                                                                | 2      |
|     | q) An air conditioner/cooler? ए सी / कूलर?                                                                                                                                          | AIR CONDITIONER/COOLER ..... 1                                                                                                                                                                                                      | 2      |
|     | r) A washing machine? कपड़े धोने की मशीन?                                                                                                                                           | WASHING MACHINE ..... 1                                                                                                                                                                                                             | 2      |
|     | s) A watch or clock? घड़ी या दीवार घड़ी?                                                                                                                                            | WATCH/CLOCK ..... 1                                                                                                                                                                                                                 | 2      |
|     | t) A bicycle? साइकिल?                                                                                                                                                               | BICYCLE ..... 1                                                                                                                                                                                                                     | 2      |
|     | u) A motorcycle or scooter? मोटर साइकिल या स्कूटर?                                                                                                                                  | MOTORCYCLE/SCOOTER ..... 1                                                                                                                                                                                                          | 2      |
|     | v) An animal-drawn cart? जानवर द्वारा खींची जानेवाली गाड़ी?                                                                                                                         | ANIMAL-DRAWN CART ..... 1                                                                                                                                                                                                           | 2      |
|     | w) A car? कार?                                                                                                                                                                      | CAR ..... 1                                                                                                                                                                                                                         | 2      |
|     | x) A water pump? वाटर पंप?                                                                                                                                                          | WATER PUMP ..... 1                                                                                                                                                                                                                  | 2      |
|     | y) A thresher? थ्रेशर?                                                                                                                                                              | THRESHER ..... 1                                                                                                                                                                                                                    | 2      |
|     | z) A tractor? ट्रैक्टर?                                                                                                                                                             | TRACTOR ..... 1                                                                                                                                                                                                                     | 2      |

| NO. | QUESTIONS AND FILTERS                                                                                                                                          | CODING CATEGORIES                                                                                                                                                                                                                                                                                                                                                                                                                         | SKIP                    |
|-----|----------------------------------------------------------------------------------------------------------------------------------------------------------------|-------------------------------------------------------------------------------------------------------------------------------------------------------------------------------------------------------------------------------------------------------------------------------------------------------------------------------------------------------------------------------------------------------------------------------------------|-------------------------|
| 38  | <p>खाना पकाने के लिए आपके घर में मुख्यतः किस प्रकार के ईंधन का इस्तेमाल किया जाता है?</p> <p>What type of fuel does your household mainly use for cooking?</p> | ELECTRICITY ..... 01<br>LPG/NATURAL GAS ..... 02<br>BIOGAS ..... 03<br>KEROSENE ..... 04<br>COAL/LIGNITE ..... 05<br>CHARCOAL ..... 06<br>WOOD ..... 07<br>STRAW/SHRUBS/GRASS ..... 08<br>AGRICULTURAL CROP WASTE ..... 09<br>DUNG CAKES ..... 10<br>NO FOOD COOKED IN HOUSEHOLD . 95<br>OTHER _____ 96<br>(SPECIFY)                                                                                                                      | <p>→ 40</p> <p>→ 42</p> |
| 39  | <p>क्या इस घर में खाना स्टोव पर, चूल्हे पर या खुली आग में पकाया जाता है?</p> <p>In this household, is food cooked on a stove, a chullah or an open fire?</p>   | STOVE ..... 1<br>CHULLAH ..... 2<br>OPEN FIRE ..... 3<br>OTHER _____ 6<br>(SPECIFY)                                                                                                                                                                                                                                                                                                                                                       |                         |
| 40  | <p>क्या खाना सामान्यतः घर में, अलग इमारत में या बाहर पकाया जाता है?</p> <p>Is the cooking usually done in the house, in a separate building, or outdoors?</p>  | IN THE HOUSE ..... 1<br>IN A SEPARATE BUILDING ..... 2<br>OUTDOORS ..... 3<br>OTHER _____ 6<br>(SPECIFY)                                                                                                                                                                                                                                                                                                                                  | <p>→ 42</p>             |
| 41  | <p>क्या आपके घर में खाना पकाने के लिए अलग कमरा है?</p> <p>Do you have a separate room which is used as a kitchen?</p>                                          | YES ..... 1<br>NO ..... 2                                                                                                                                                                                                                                                                                                                                                                                                                 |                         |
| 42  | <p>MAIN MATERIAL OF THE FLOOR.</p> <p>RECORD OBSERVATION.</p>                                                                                                  | <b>NATURAL FLOOR</b><br>MUD/CLAY/EARTH ..... 11<br>SAND ..... 12<br>DUNG ..... 13<br><b>RUDIMENTARY FLOOR</b><br>RAW WOOD PLANKS ..... 21<br>PALM/BAMBOO ..... 22<br>BRICK ..... 23<br>STONE ..... 24<br><b>FINISHED FLOOR</b><br>PARQUET OR POLISHED WOOD . 31<br>VINYL OR ASPHALT ..... 32<br>CERAMIC TILES ..... 33<br>CEMENT ..... 34<br>CARPET ..... 35<br>POLISHED STONE/MARBLE/<br>GRANITE ..... 36<br>OTHER _____ 96<br>(SPECIFY) |                         |

| NO. | QUESTIONS AND FILTERS                                                                                                                 | CODING CATEGORIES                                                                                                                                                                                                                                                                                                                                                                                                                                                                                                                                                                                                                                                                                                                                 | SKIP |
|-----|---------------------------------------------------------------------------------------------------------------------------------------|---------------------------------------------------------------------------------------------------------------------------------------------------------------------------------------------------------------------------------------------------------------------------------------------------------------------------------------------------------------------------------------------------------------------------------------------------------------------------------------------------------------------------------------------------------------------------------------------------------------------------------------------------------------------------------------------------------------------------------------------------|------|
| 43  | <p>MAIN MATERIAL OF THE ROOF.</p> <p>RECORD OBSERVATION.</p>                                                                          | <p><b>NATURAL ROOFING</b></p> <p>NO ROOF ..... 11</p> <p>THATCH/PALM LEAF/<br/>REED/GRASS ..... 12</p> <p>MUD ..... 13</p> <p>SOD/MUD AND GRASS MIXTURE . 14</p> <p>PLASTIC/POLYTHENE SHEETING . 15</p> <p><b>RUDIMENTARY ROOFING</b></p> <p>RUSTIC MAT ..... 21</p> <p>PALM/BAMBOO ..... 22</p> <p>RAW WOOD PLANKS/TIMBER ..... 23</p> <p>UNBURNT BRICK ..... 24</p> <p>LOOSELY PACKED STONE ..... 25</p> <p><b>FINISHED ROOFING</b></p> <p>METAL/GI ..... 31</p> <p>WOOD ..... 32</p> <p>CALAMINE/CEMENT FIBER ..... 33</p> <p>ASBESTOS SHEETS ..... 34</p> <p>RCC/RBC/CEMENT/CONCRETE .... 35</p> <p>ROOFING SHINGLES ..... 36</p> <p>TILES ..... 37</p> <p>SLATE ..... 38</p> <p>BURNT BRICK ..... 39</p> <p>OTHER _____ 96<br/>(SPECIFY)</p> |      |
| 44  | <p>MAIN MATERIAL OF THE EXTERIOR WALLS.</p> <p>RECORD OBSERVATION.</p>                                                                | <p><b>NATURAL WALLS</b></p> <p>NO WALLS ..... 11</p> <p>CANE/PALM/TRUNKS/BAMBOO .... 12</p> <p>MUD ..... 13</p> <p>GRASS/REEDS/THATCH ..... 14</p> <p><b>RUDIMENTARY WALLS</b></p> <p>BAMBOO WITH MUD ..... 21</p> <p>STONE WITH MUD ..... 22</p> <p>PLYWOOD ..... 23</p> <p>CARDBOARD ..... 24</p> <p>UNBURNT BRICK ..... 25</p> <p>RAW WOOD/REUSED WOOD ..... 26</p> <p><b>FINISHED WALLS</b></p> <p>CEMENT/CONCRETE ..... 31</p> <p>STONE WITH LIME/CEMENT ..... 32</p> <p>BURNT BRICKS ..... 33</p> <p>CEMENT BLOCKS ..... 34</p> <p>WOOD PLANKS/SHINGLES ..... 35</p> <p>GI/METAL/ASBESTOS SHEETS ..... 36</p> <p>OTHER _____ 96<br/>(SPECIFY)</p>                                                                                           |      |
| 45  | <p>इस घर में सोने के लिए कितने कमरों का उपयोग किया जाता है?<br/>How many rooms in this household are used for sleeping?</p>           | <p>ROOMS ..... <input type="text"/> <input type="text"/></p>                                                                                                                                                                                                                                                                                                                                                                                                                                                                                                                                                                                                                                                                                      |      |
| 46  | <p>क्या यह परिवार इस घर का या किसी दूसरे घर का मालिक है?<br/>Does any member of this household own this house or any other house?</p> | <p>YES ..... 1</p> <p>NO ..... 2</p>                                                                                                                                                                                                                                                                                                                                                                                                                                                                                                                                                                                                                                                                                                              | → 48 |
| 47  | <p>उस घर का मालिक कौन है?<br/>Who owns the house?</p>                                                                                 | <p>MALE MEMBER ..... 1</p> <p>FEMALE MEMBER ..... 2</p> <p>BOTH ..... 3</p> <p>DON'T KNOW ..... 8</p>                                                                                                                                                                                                                                                                                                                                                                                                                                                                                                                                                                                                                                             |      |
| 48  | <p>क्या इस परिवार का कोई भी सदस्य किसी खेतीहर ज़मीन का मालिक है?<br/>Does any member of this household own any agricultural land?</p> | <p>YES ..... 1</p> <p>NO ..... 2</p>                                                                                                                                                                                                                                                                                                                                                                                                                                                                                                                                                                                                                                                                                                              | → 52 |

| NO. | QUESTIONS AND FILTERS                                                                                                                                                                                                                                                                                                   | CODING CATEGORIES                                                                                                                                                                                                                                                                                                                                                                                                                                                 | SKIP |
|-----|-------------------------------------------------------------------------------------------------------------------------------------------------------------------------------------------------------------------------------------------------------------------------------------------------------------------------|-------------------------------------------------------------------------------------------------------------------------------------------------------------------------------------------------------------------------------------------------------------------------------------------------------------------------------------------------------------------------------------------------------------------------------------------------------------------|------|
| 49  | इस खेतीहर ज़मीन का मालिक कौन है?<br>Who owns this agricultural land ?                                                                                                                                                                                                                                                   | MALE MEMBER ..... 1<br>FEMALE MEMBER ..... 2<br>BOTH ..... 3<br>DONT KNOW ..... 8                                                                                                                                                                                                                                                                                                                                                                                 |      |
| 50  | इस परिवार के सदस्यों के पास अपनी कितनी खेतीहर ज़मीन है?<br>How much agricultural land do members of this household own?<br><br>_____<br>(IF NOT IN ACRES, SPECIFY SIZE AND UNIT)                                                                                                                                        | ACRES ..... <input type="text"/> <input type="text"/> <input type="text"/> . <input type="text"/>                                                                                                                                                                                                                                                                                                                                                                 |      |
| 51  | इस ज़मीन में से कितनी सिंचित है?<br>Out of this land, how much is irrigated?<br><br>_____<br>(IF NOT IN ACRES, SPECIFY SIZE AND UNIT)                                                                                                                                                                                   | ACRES ..... <input type="text"/> <input type="text"/> <input type="text"/> . <input type="text"/><br>NONE ..... 9995<br>DONT KNOW ..... 9998                                                                                                                                                                                                                                                                                                                      |      |
| 52  | क्या आपके परिवार के पास इनमें से कोई मवेशी है:<br>Does your household own any of the following animals:<br><br>a) Cows, bulls, or buffaloes? गाय, बैल या भैंस?<br>b) Camels? ऊँट?<br>c) Horses, donkeys, or mules? घोड़े, गधे या खच्चर?<br>d) Goats? बकरी?<br>e) Sheep? भेड़?<br>f) Chickens or ducks? मुर्गा या बत्तख? | YES NO<br>COWS/BULLS/BUFFALOES .... 1 2<br>CAMELS ..... 1 2<br>HORSES/DONKEYS/MULES . 1 2<br>GOATS ..... 1 2<br>SHEEP ..... 1 2<br>CHICKENS/DUCKS ..... 1 2                                                                                                                                                                                                                                                                                                       |      |
| 53  | क्या इस परिवार के किसी सामान्य सदस्य का बैंक या डाकघर में कोई खाता है?<br>Does any usual member of this household have a bank account or a post office account?                                                                                                                                                         | YES ..... 1<br>NO ..... 2<br>DONT KNOW ..... 8                                                                                                                                                                                                                                                                                                                                                                                                                    |      |
| 54  | क्या इस परिवार का कोई सामान्य सदस्य स्वास्थ्य योजना या स्वास्थ्य बीमा के अंतर्गत आता है?<br>Is any usual member of this household covered by a health scheme or health insurance?                                                                                                                                       | YES ..... 1<br>NO ..... 2<br>DONT KNOW ..... 8                                                                                                                                                                                                                                                                                                                                                                                                                    | → 56 |
| 55  | स्वास्थ्य योजना या स्वास्थ्य बीमा किस प्रकार का है?<br>अन्य किसी प्रकार का?<br><br>What type of health scheme or health insurance?<br>Any other type?<br><br>RECORD ALL MENTIONED.                                                                                                                                      | EMPLOYEES STATE<br>INSURANCE SCHEME (ESIS) ..... A<br>CENTRAL GOVERNMENT HEALTH<br>SCHEME (CGHS) ..... B<br>STATE HEALTH INSURANCE<br>SCHEME ..... C<br>RASHTRIYA SWASTHYA BIMA YOJANA<br>(RSBY) ..... D<br>COMMUNITY HEALTH INSURANCE<br>PROGRAMME ..... E<br>OTHER HEALTH INSURANCE<br>THROUGH EMPLOYER ..... F<br>MEDICAL REIMBURSEMENT FROM<br>EMPLOYER ..... G<br>OTHER PRIVATELY PURCHASED<br>COMMERCIAL HEALTH INSURANCE . H<br>OTHER _____ X<br>(SPECIFY) |      |

| NO. | QUESTIONS AND FILTERS                                                                                                                                                                                                                                                        | CODING CATEGORIES                                                                                                                                                                                                                                                                                                                                                                                                                                                                                                                                                                                                                                                                                                                                                                                                                                                                                                                                | SKIP        |
|-----|------------------------------------------------------------------------------------------------------------------------------------------------------------------------------------------------------------------------------------------------------------------------------|--------------------------------------------------------------------------------------------------------------------------------------------------------------------------------------------------------------------------------------------------------------------------------------------------------------------------------------------------------------------------------------------------------------------------------------------------------------------------------------------------------------------------------------------------------------------------------------------------------------------------------------------------------------------------------------------------------------------------------------------------------------------------------------------------------------------------------------------------------------------------------------------------------------------------------------------------|-------------|
| 56  | <p>जब आपके परिवार के सदस्य बीमार पड़ते हैं तो वे सामान्यतः इलाज के लिए कहाँ जाते हैं?</p> <p>When members of your household get sick, where do they generally go for treatment?</p>                                                                                          | <p><b>PUBLIC HEALTH SECTOR</b></p> <p>GOVT./MUNICIPAL HOSPITAL ..... 11</p> <p>GOVT. DISPENSARY ..... 12</p> <p>UHC/UHP/UFWC ..... 13</p> <p>CHC/RURAL HOSPITAL/BLOCK PHC . 14</p> <p>PHC / ADDITIONAL PHC ..... 15</p> <p>SUB-CENTRE ..... 16</p> <p>VAIDYA/HAKIM/HOMEOPATH (AYUSH) 17</p> <p>ANGANWADI/ICDS CENTRE ..... 18</p> <p>ASHA ..... 19</p> <p>GOVT. MOBILE CLINIC ..... 20</p> <p>OTHER PUBLIC SECTOR<br/>HEALTH FACILITY ..... 21</p> <p>NGO OR TRUST HOSPITAL/CLINIC .... 31</p> <p><b>PRIVATE HEALTH SECTOR</b></p> <p>PVT. HOSPITAL ..... 41</p> <p>PVT. DOCTOR/CLINIC ..... 42</p> <p>PVT. PARAMEDIC ..... 43</p> <p>VAIDYA/HAKIM/HOMEOPATH (AYUSH) 44</p> <p>TRADITIONAL HEALER ..... 45</p> <p>PHARMACY/DRUGSTORE ..... 46</p> <p>DAI (TBA) ..... 47</p> <p>OTHER PRIVATE SECTOR<br/>HEALTH FACILITY ..... 48</p> <p><b>OTHER</b></p> <p>SHOP ..... 51</p> <p>HOME TREATMENT ..... 52</p> <p>OTHER _____ 96<br/>(SPECIFY)</p> | <p>→ 58</p> |
| 57  | <p>आपके परिवार के सदस्य बीमार पड़ने पर सामान्यतः सरकारी सुविधा में क्यों नहीं जाते हैं?</p> <p>कोई अन्य कारण?</p> <p>Why don't members of your household generally go to a government facility when they are sick?</p> <p>Any other reason?</p> <p>RECORD ALL MENTIONED.</p> | <p>NO NEARBY FACILITY ..... A</p> <p>FACILITY TIMING NOT CONVENIENT .... B</p> <p>HEALTH PERSONNEL OFTEN ABSENT . C</p> <p>WAITING TIME TOO LONG ..... D</p> <p>POOR QUALITY OF CARE ..... E</p> <p>OTHER _____ X<br/>(SPECIFY)</p>                                                                                                                                                                                                                                                                                                                                                                                                                                                                                                                                                                                                                                                                                                              |             |
| 58  | <p>क्या इस परिवार के पास बी पी एल कार्ड है?</p> <p>Does this household have a BPL card?</p>                                                                                                                                                                                  | <p>YES ..... 1</p> <p>NO ..... 2</p> <p>DON'T KNOW ..... 8</p>                                                                                                                                                                                                                                                                                                                                                                                                                                                                                                                                                                                                                                                                                                                                                                                                                                                                                   |             |
| 59  | <p>क्या इस परिवार के पास कोई मच्छरदानी है जिसका इस्तेमाल सोते समय किया जा सकता है?</p> <p>Does your household have any mosquito nets that can be used while sleeping?</p>                                                                                                    | <p>YES ..... 1</p> <p>NO ..... 2</p>                                                                                                                                                                                                                                                                                                                                                                                                                                                                                                                                                                                                                                                                                                                                                                                                                                                                                                             | <p>→ 66</p> |
| 60  | <p>आपके घर में कितनी मच्छरदानियाँ हैं?</p> <p>How many mosquito nets does your household have?</p> <p>IF 7 OR MORE NETS, RECORD '7'.</p>                                                                                                                                     | <p>NUMBER OF NETS ..... <input type="text"/></p>                                                                                                                                                                                                                                                                                                                                                                                                                                                                                                                                                                                                                                                                                                                                                                                                                                                                                                 |             |
| 61  | <p>मच्छरदानी (मच्छरदानियाँ) आपको कहाँ से मिली?</p> <p>From where did you get the mosquito net(s)?</p> <p>RECORD ALL MENTIONED.</p>                                                                                                                                           | <p>PURCHASED FROM THE MARKET ..... A</p> <p>GOVERNMENT ..... B</p> <p>SUPPLIED BY NGO/TRUST ..... C</p> <p>OTHER _____ X<br/>(SPECIFY)</p> <p>DON'T KNOW ..... Z</p>                                                                                                                                                                                                                                                                                                                                                                                                                                                                                                                                                                                                                                                                                                                                                                             |             |

|    |                                                                                                                                                                                   | NET #1                                                                                                                                                                                                                                                                                                                                                                                                                           | NET #2                                                                                                                                                                                                                                                                                                                                                                                                                           | NET #3                                                                                                                                                                                                                                                                                                                                                                                                                     |
|----|-----------------------------------------------------------------------------------------------------------------------------------------------------------------------------------|----------------------------------------------------------------------------------------------------------------------------------------------------------------------------------------------------------------------------------------------------------------------------------------------------------------------------------------------------------------------------------------------------------------------------------|----------------------------------------------------------------------------------------------------------------------------------------------------------------------------------------------------------------------------------------------------------------------------------------------------------------------------------------------------------------------------------------------------------------------------------|----------------------------------------------------------------------------------------------------------------------------------------------------------------------------------------------------------------------------------------------------------------------------------------------------------------------------------------------------------------------------------------------------------------------------|
| 62 | OBSERVE OR ASK THE BRAND/<br>TYPE OF MOSQUITO NET.<br>IF BRAND IS UNKNOWN AND<br>YOU CANNOT OBSERVE THE<br>NET, SHOW PICTURES OF<br>TYPICAL NET TYPES/BRANDS<br>TO RESPONDENT.    | <b>LONG-LASTING<br/>INSECTICIDE-<br/>TREATED NET (LLIN)</b><br>DAWA PLUS . . . . 11<br>DURANET . . . . . 12<br>INTERCEPTOR . 13<br>LIFENET . . . . . 14<br>MAGNET . . . . . 15<br>NETPROTECT . . 16<br>OLYSET . . . . . 17<br>PERMANET . . . . 18<br>ROYAL SENTRY . . 19<br>YORKKOL . . . . . 20<br>OTHER/<br>DK BRAND . . . . . 26<br><br><b>'PRETREATED' NET . 30</b><br><br>OTHER BRAND . . . . . 96<br>DK BRAND . . . . . 98 | <b>LONG-LASTING<br/>INSECTICIDE-<br/>TREATED NET (LLIN)</b><br>DAWA PLUS . . . . 11<br>DURANET . . . . . 12<br>INTERCEPTOR . 13<br>LIFENET . . . . . 14<br>MAGNET . . . . . 15<br>NETPROTECT . . 16<br>OLYSET . . . . . 17<br>PERMANET . . . . 18<br>ROYAL SENTRY . . 19<br>YORKKOL . . . . . 20<br>OTHER/<br>DK BRAND . . . . . 26<br><br><b>'PRETREATED' NET . 30</b><br><br>OTHER BRAND . . . . . 96<br>DK BRAND . . . . . 98 | <b>LONG-LASTING<br/>INSECTICIDE-<br/>TREATED NET (LLIN)</b><br>DAWA PLUS . . . 11<br>DURANET . . . . . 12<br>INTERCEPTOR . 13<br>LIFENET . . . . . 14<br>MAGNET . . . . . 15<br>NETPROTECT . . 16<br>OLYSET . . . . . 17<br>PERMANET . . . 18<br>ROYAL SENTRY . . 19<br>YORKKOL . . . . . 20<br>OTHER/<br>DK BRAND . . . . 26<br><br><b>'PRETREATED' NET . 30</b><br><br>OTHER BRAND . . . . . 96<br>DK BRAND . . . . . 98 |
| 63 | इस मच्छरदानी में पिछली रात को क्या<br>क्या सोया था?<br>Did anyone sleep under this<br>mosquito net last night?                                                                    | YES . . . . . 1<br>NO . . . . . 2<br>(SKIP TO 65) ←<br>NOT SURE . . . . . 8                                                                                                                                                                                                                                                                                                                                                      | YES . . . . . 1<br>NO . . . . . 2<br>(SKIP TO 65) ←<br>NOT SURE . . . . . 8                                                                                                                                                                                                                                                                                                                                                      | YES . . . . . 1<br>NO . . . . . 2<br>(SKIP TO 65) ←<br>NOT SURE . . . . . 8                                                                                                                                                                                                                                                                                                                                                |
| 64 | इस मच्छरदानी में पिछली रात कौन सोया<br>था?<br>Who slept under this mosquito<br>net last night?<br><br>RECORD THE PERSON'S NAME<br>AND LINE NUMBER FROM THE<br>HOUSEHOLD SCHEDULE. | NAME _____<br>LINE _____<br>NO. . . . . <input type="text"/> <input type="text"/><br>-----<br>NAME _____<br>LINE _____<br>NO. . . . . <input type="text"/> <input type="text"/><br>-----<br>NAME _____<br>LINE _____<br>NO. . . . . <input type="text"/> <input type="text"/><br>-----<br>NAME _____<br>LINE _____<br>NO. . . . . <input type="text"/> <input type="text"/>                                                      | NAME _____<br>LINE _____<br>NO. . . . . <input type="text"/> <input type="text"/><br>-----<br>NAME _____<br>LINE _____<br>NO. . . . . <input type="text"/> <input type="text"/><br>-----<br>NAME _____<br>LINE _____<br>NO. . . . . <input type="text"/> <input type="text"/><br>-----<br>NAME _____<br>LINE _____<br>NO. . . . . <input type="text"/> <input type="text"/>                                                      | NAME _____<br>LINE _____<br>NO. . . . . <input type="text"/> <input type="text"/><br>-----<br>NAME _____<br>LINE _____<br>NO. . . . . <input type="text"/> <input type="text"/><br>-----<br>NAME _____<br>LINE _____<br>NO. . . . . <input type="text"/> <input type="text"/><br>-----<br>NAME _____<br>LINE _____<br>NO. . . . . <input type="text"/> <input type="text"/>                                                |
| 65 |                                                                                                                                                                                   | GO BACK TO 62 FOR<br>NEXT NET; OR, IF NO<br>MORE NETS,<br>GO TO 66.                                                                                                                                                                                                                                                                                                                                                              | GO BACK TO 62 FOR<br>NEXT NET; OR, IF NO<br>MORE NETS,<br>GO TO 66.                                                                                                                                                                                                                                                                                                                                                              | GO TO 62 IN FIRST<br>COLUMN OF A NEW<br>QUESTIONNAIRE;<br>OR, IF NO MORE<br>NETS, GO TO 66.                                                                                                                                                                                                                                                                                                                                |

| NO. | QUESTIONS AND FILTERS                                                                                                                                              | CODING CATEGORIES                                                                                                                                                                                        |
|-----|--------------------------------------------------------------------------------------------------------------------------------------------------------------------|----------------------------------------------------------------------------------------------------------------------------------------------------------------------------------------------------------|
| 66  | <p>कृपया मुझे वह स्थान दिखाएं जहां पर आपके घर के सदस्य प्रायः हाथ धोते हैं।</p> <p>Please show me where members of your household most often wash their hands.</p> | <p>OBSERVED ..... 1</p> <p>NOT OBSERVED,<br/>NOT IN DWELLING/YARD/PLOT ..... 2</p> <p>NOT OBSERVED,<br/>NO PERMISSION TO SEE ..... 3</p> <p>NOT OBSERVED, OTHER REASON ..... 4</p> <p>(SKIP TO 69) ←</p> |
| 67  | <p>OBSERVATION ONLY:<br/>OBSERVE PRESENCE OF WATER AT THE<br/>PLACE FOR HANDWASHING.</p>                                                                           | <p>WATER IS AVAILABLE ..... 1</p> <p>WATER IS NOT AVAILABLE ..... 2</p>                                                                                                                                  |
| 68  | <p>OBSERVATION ONLY:<br/>OBSERVE PRESENCE OF SOAP, DETERGENT, OR<br/>OTHER CLEANSING AGENT.</p>                                                                    | <p>SOAP OR DETERGENT<br/>(BAR, LIQUID, POWDER, PASTE) ..... A</p> <p>ASH, MUD, SAND ..... B</p> <p>NONE ..... C</p>                                                                                      |
| 69  | <p>ASK RESPONDENT FOR A TEASPOONFUL OF<br/>COOKING SALT.</p> <p>TEST SALT FOR IODINE.</p>                                                                          | <p>IODINE PRESENT ..... 1</p> <p>NO IODINE ..... 2</p> <p>NO SALT IN HOUSEHOLD ..... 3</p> <p>SALT NOT TESTED ..... 6</p> <p>(SPECIFY REASON)</p>                                                        |

| NO. | QUESTIONS AND FILTERS                                                                                                                     | CODING CATEGORIES         |       |
|-----|-------------------------------------------------------------------------------------------------------------------------------------------|---------------------------|-------|
| 70  | January 2012 से लेकर क्या इस घर के किसी सामान्य सदस्य का मृत्यु हुआ है?<br>Did any usual member of this household die since January 2012? | YES ..... 1<br>NO ..... 2 | → END |

|    |                                                         |                                         |  |
|----|---------------------------------------------------------|-----------------------------------------|--|
| 71 | कितने लोगों कि मृत्यु हुई है?<br>How many persons died? | TOTAL DEATHS ..... <input type="text"/> |  |
|----|---------------------------------------------------------|-----------------------------------------|--|

| 72                                                                                                     | 73                                                                | 74                                                                                                                                                          | 75                                                                                                                                                 | 76                                                                                                                                                         | 77                                                                                                                                                                                                                                                                                                          |
|--------------------------------------------------------------------------------------------------------|-------------------------------------------------------------------|-------------------------------------------------------------------------------------------------------------------------------------------------------------|----------------------------------------------------------------------------------------------------------------------------------------------------|------------------------------------------------------------------------------------------------------------------------------------------------------------|-------------------------------------------------------------------------------------------------------------------------------------------------------------------------------------------------------------------------------------------------------------------------------------------------------------|
| कृपया उनका नाम बताये जिनकी मृत्यु हुई.<br><br>Please tell the name(s) of the (person/people) who died. | क्या (NAME) पुरुष था या स्त्री?<br><br>Was (NAME) male or female? | (NAME) कि आयु कितनी थी जब (उनका/उनकी) मृत्यु हुआ/हुई थी?<br><br>How old was (NAME) when (he/she) died?                                                      | किस महीने और साल में (NAME) कि मृत्यु हुई?<br><br>In what month and year did (NAME) die?                                                           | क्या मृत्यु दुर्घटना, हिंसा, विष [जहर], हत्या या आत्महत्या के कारण हुई?<br><br>Was the death due to an accident, violence, poisoning, homicide or suicide? | <b>IF FEMALE AND DIED WHEN 12 YEARS OR OLDER:</b><br>क्या (NAME) कि मृत्यु गर्भावस्था के दौरान, प्रसव के दौरान, या गर्भावस्था के समाप्ति या बच्चे के जन्म के दो महीने के अंदर हुई?<br><br>Did (NAME) die during pregnancy, during childbirth or within two months after the end of pregnancy or childbirth? |
| (1)<br><br>NAME                                                                                        | MALE . 1<br>FEMALE . 2                                            | DAYS 1 <input type="text"/> <input type="text"/><br>MONTHS 2 <input type="text"/> <input type="text"/><br>YEARS 3 <input type="text"/> <input type="text"/> | MONTH <input type="text"/> <input type="text"/><br><br><input type="text"/> <input type="text"/> <input type="text"/> <input type="text"/><br>YEAR | YES ... 1<br>GO TO<br>NEXT LINE<br>NO ..... 2                                                                                                              | YES ..... 1<br>NO ..... 2                                                                                                                                                                                                                                                                                   |
| (2)<br><br>NAME                                                                                        | MALE . 1<br>FEMALE . 2                                            | DAYS 1 <input type="text"/> <input type="text"/><br>MONTHS 2 <input type="text"/> <input type="text"/><br>YEARS 3 <input type="text"/> <input type="text"/> | MONTH <input type="text"/> <input type="text"/><br><br><input type="text"/> <input type="text"/> <input type="text"/> <input type="text"/><br>YEAR | YES ... 1<br>GO TO<br>NEXT LINE<br>NO ..... 2                                                                                                              | YES ..... 1<br>NO ..... 2                                                                                                                                                                                                                                                                                   |
| (3)<br><br>NAME                                                                                        | MALE . 1<br>FEMALE . 2                                            | DAYS 1 <input type="text"/> <input type="text"/><br>MONTHS 2 <input type="text"/> <input type="text"/><br>YEARS 3 <input type="text"/> <input type="text"/> | MONTH <input type="text"/> <input type="text"/><br><br><input type="text"/> <input type="text"/> <input type="text"/> <input type="text"/><br>YEAR | YES ... 1<br>GO TO<br>NEXT LINE<br>NO ..... 2                                                                                                              | YES ..... 1<br>NO ..... 2                                                                                                                                                                                                                                                                                   |
| (4)<br><br>NAME                                                                                        | MALE . 1<br>FEMALE . 2                                            | DAYS 1 <input type="text"/> <input type="text"/><br>MONTHS 2 <input type="text"/> <input type="text"/><br>YEARS 3 <input type="text"/> <input type="text"/> | MONTH <input type="text"/> <input type="text"/><br><br><input type="text"/> <input type="text"/> <input type="text"/> <input type="text"/><br>YEAR | YES ... 1<br>GO TO<br>NEXT LINE<br>NO ..... 2                                                                                                              | YES ..... 1<br>NO ..... 2                                                                                                                                                                                                                                                                                   |
| (5)<br><br>NAME                                                                                        | MALE . 1<br>FEMALE . 2                                            | DAYS 1 <input type="text"/> <input type="text"/><br>MONTHS 2 <input type="text"/> <input type="text"/><br>YEARS 3 <input type="text"/> <input type="text"/> | MONTH <input type="text"/> <input type="text"/><br><br><input type="text"/> <input type="text"/> <input type="text"/> <input type="text"/><br>YEAR | YES ... 1<br>GO TO<br>NEXT LINE<br>NO ..... 2                                                                                                              | YES ..... 1<br>NO ..... 2                                                                                                                                                                                                                                                                                   |

INTERVIEWER'S OBSERVATIONS

TO BE FILLED IN AFTER COMPLETING INTERVIEW

COMMENTS ABOUT RESPONDENT:

---

---

---

---

---

---

COMMENTS ON SPECIFIC QUESTIONS:

---

---

---

---

---

ANY OTHER COMMENTS:

---

---

---

---

---

SUPERVISOR'S OBSERVATIONS

---

---

---

---

---

---

---

---

NAME OF SUPERVISOR: \_\_\_\_\_ DATE: \_\_\_\_\_
